# Supplementary material
Source: PubMed Central journal article supplement (PMC7901672)
Supplement: sb0c00572_si_001.pdf [file sb0c00572_si_001.pdf]

## **Supporting Information: Macrolide biosensor optimization through cellular substrate sequestration**

Corwin A. Miller<sup>1,\*</sup>, Joanne M. Ho<sup>1,\*</sup>, Sydney E. Parks<sup>1</sup>, and Matthew R. Bennett<sup>1, 2,†</sup>

<sup>1</sup> Department of Biosciences, Rice University, 6100 Main St., Houston, TX 77005, USA

<sup>2</sup> Department of Bioengineering, Rice University, 6100 Main St., Houston, TX 77005, USA

\* These authors contributed equally.

† Correspondence: [matthew.bennett@rice.edu](mailto:matthew.bennett@rice.edu)

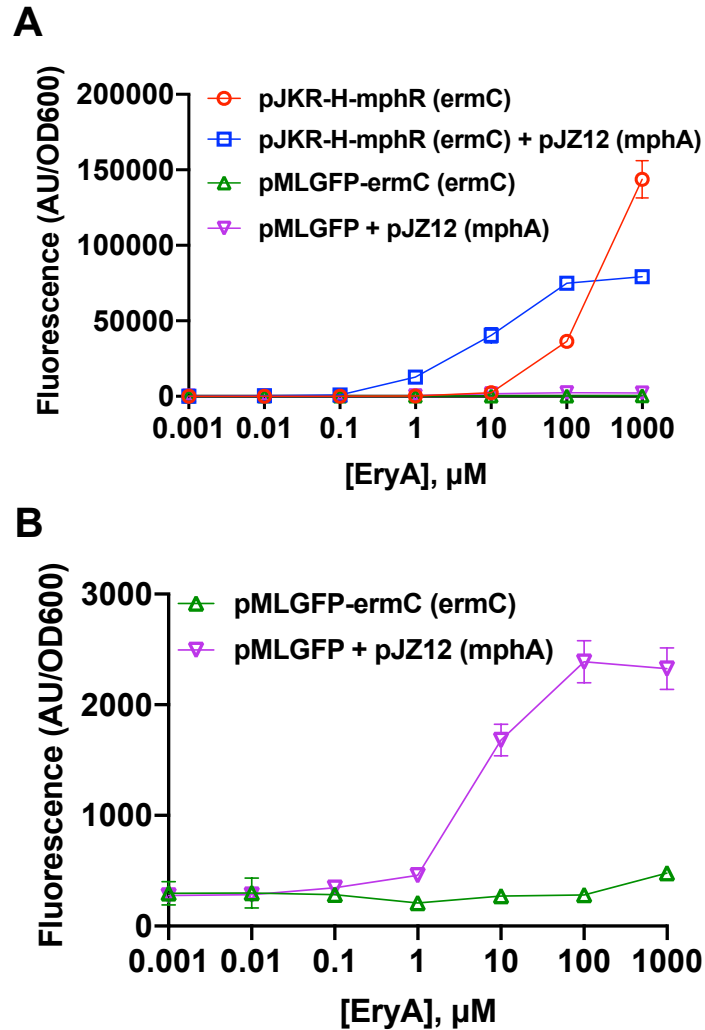

**Figure S1.** Comparison of previously engineered EryA detection and resistance constructs. (A) Biosensor construct pJKR-H-mphR mediated significantly greater EryA response compared to pMLGFP. Co-transformation with pJZ12 (expressing *mphA*) further increased detection sensitivity. (B) Plasmid pMLGFP combined with pJZ12 exhibited significantly greater response compared to pMLGFP-ermC. Tests were performed using three biological replicates; standard deviations are shown as error bars for each point across these three replicates. Small error bars are not visible for some samples exhibiting small standard deviation.

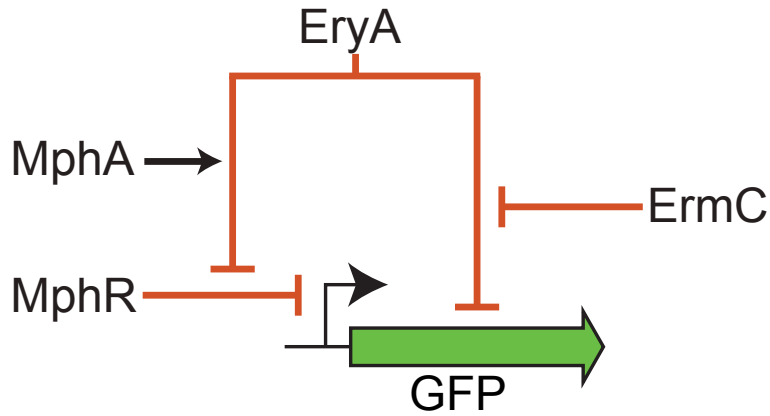

**Figure S2.** Genetic circuit diagram showing components tested in this work. For all gene circuits tested, EryA (or other macrolide drugs) inhibit MphR repression of GFP, resulting in induction of GFP expression. When MphA is present, this gene potentiates the effects of low concentrations of EryA by increasing its intracellular concentration. In the absence of ErmC, high concentrations of EryA inhibit translation of proteins, including GFP. The presence of ErmC prevents this effect, resulting in increased GFP expression at high concentrations of EryA.

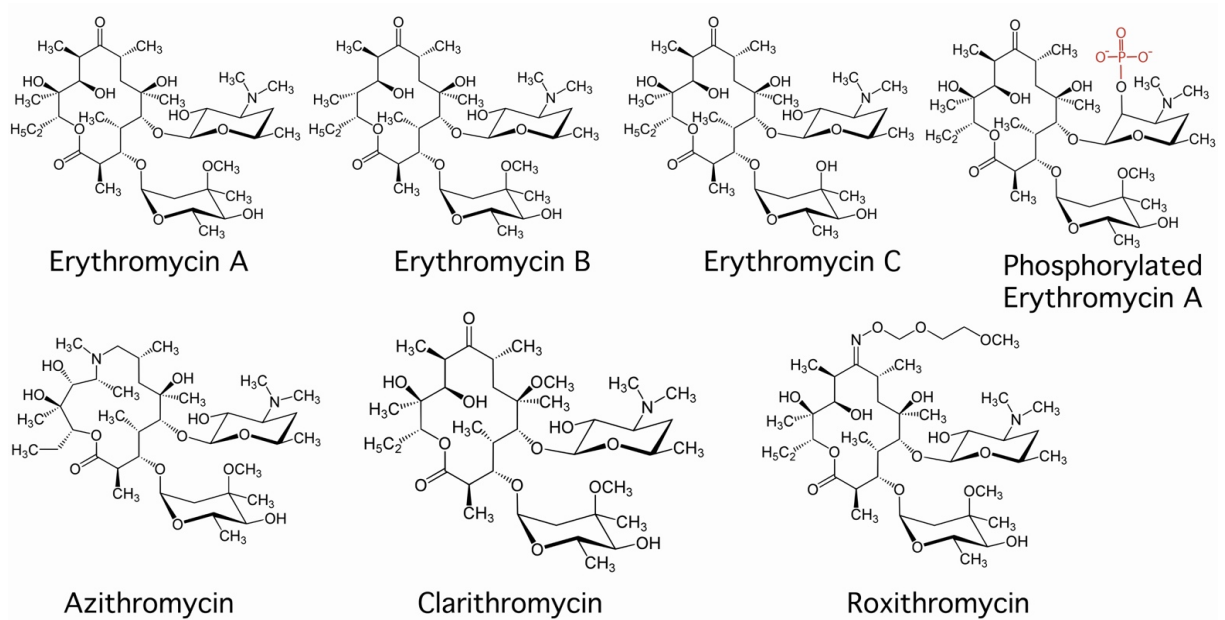

**Figure S3.** Macrolides used in this study. Phosphorylated EryA was produced within *E. coli* cells following expression of *mphA* and exposure to EryA. All other compounds were commercially sourced.

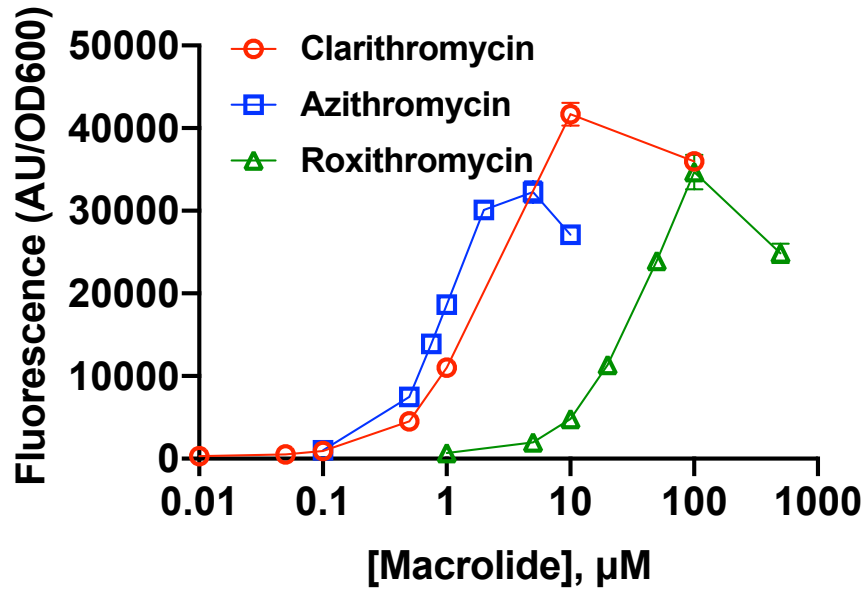

**Figure S4.** Detection of macrolide derivatives using biosensor construct pCM54. Construct pCM54 contains *mphA* as the sole macrolide resistance gene. For each compound, detection was impaired at high concentrations, likely due to effects of the antibiotics on cell fitness. Tests were performed using three biological replicates; standard deviations are shown as error bars for each point across these three replicates. Small error bars are not visible for some samples exhibiting small standard deviation.

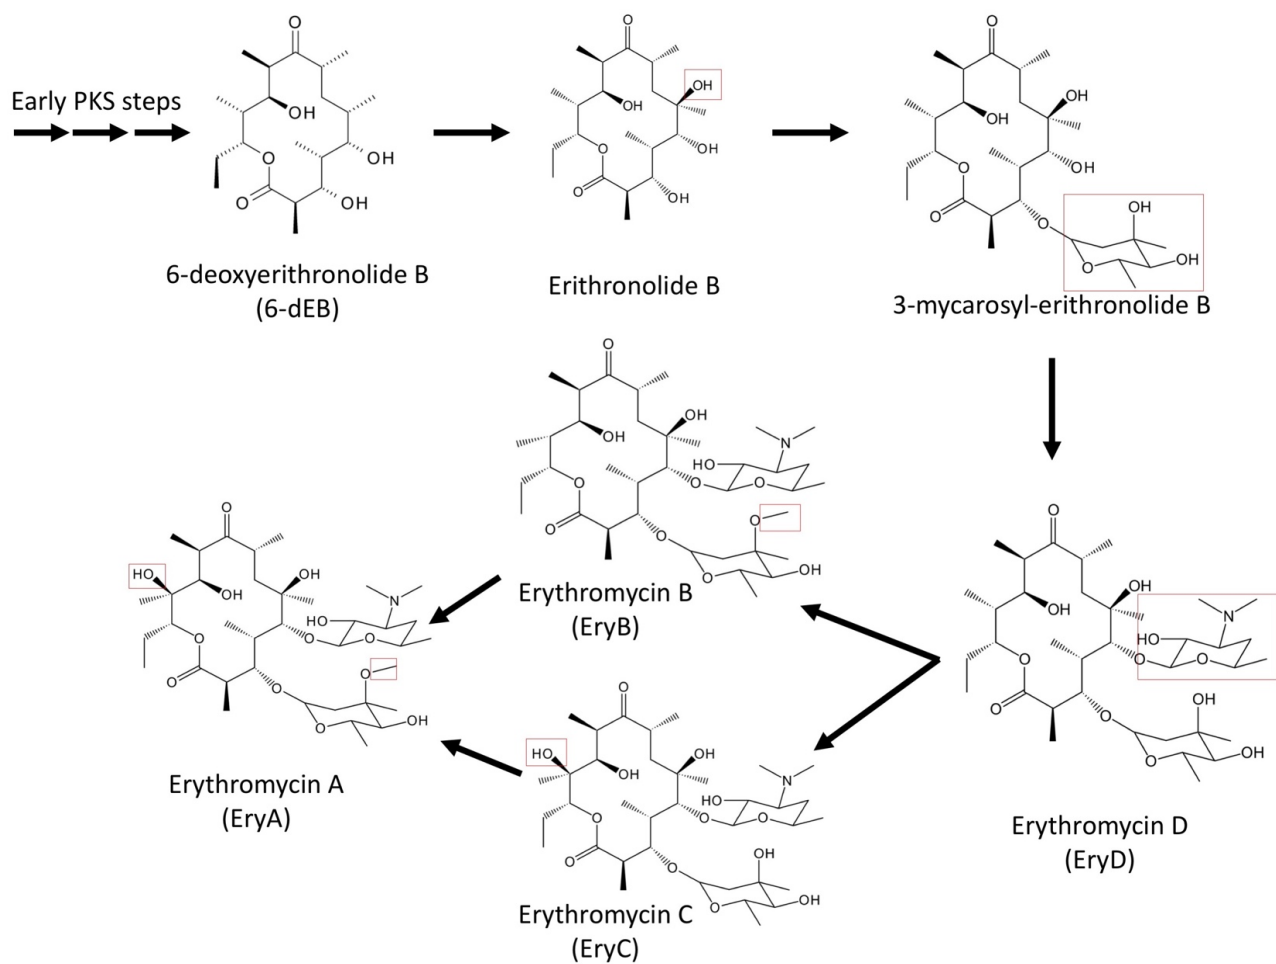

**Figure S5.** Macrolide precursors formed during EryA biosynthesis. Compound 6-dEB is biosynthesized first, with successive arrows indicating subsequent macrolide compounds formed during biosynthesis. Red boxes indicate modified regions relative to the prior precursor. As subsequent modifications to EryD can be performed in any order, EryB and EryC both serve as immediate precursors to EryA.

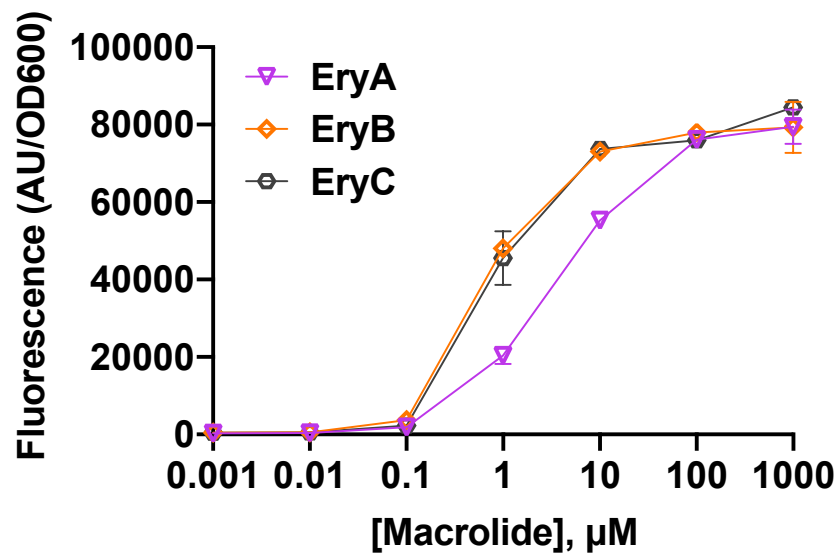

**Figure S6.** Detection of EryA and two precursors using cells containing biosensor construct pCM120. While precursor EryB produced a similar fluorescent response compared to EryA, somewhat reduced sensitivity was observed for EryC. This difference can likely be attributed to poor solubility of EryC (see text). Tests were performed using three biological replicates; standard deviations are shown as error bars for each point across these three replicates. Small error bars are not visible for some samples exhibiting small standard deviation.

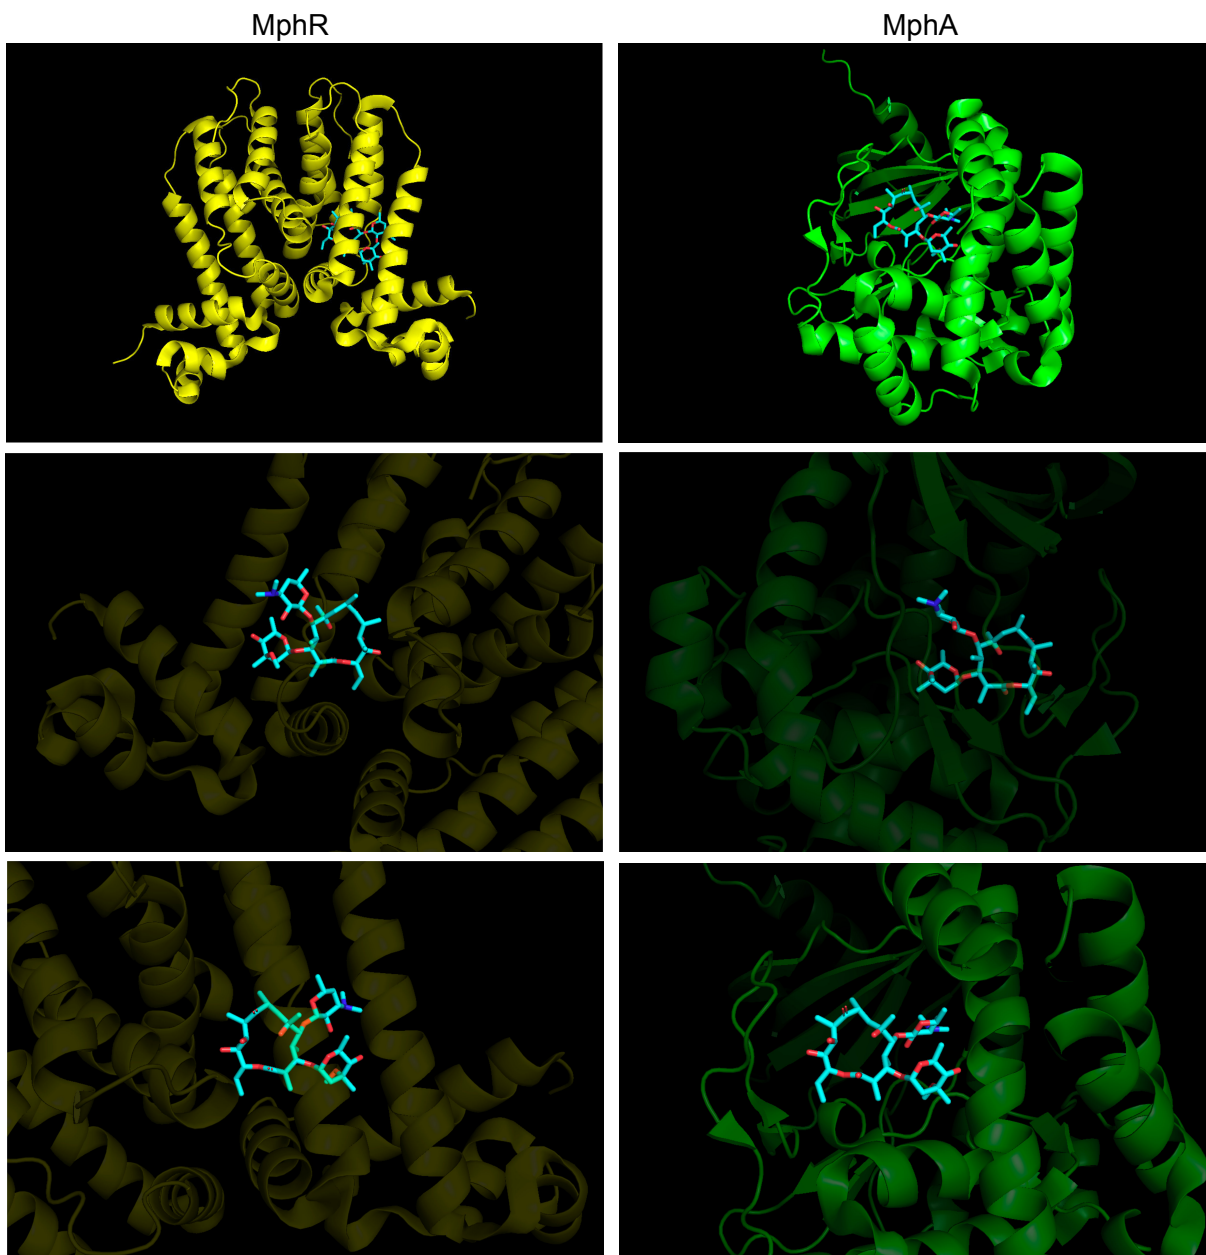

**Figure S7.** EryA in separate co-complexes with MphR and MphA. In the left column, EryA (shown in teal) is depicted from multiple angles in co-complex with MphR (shown in yellow) from PDB: 3FRQ<sup>1</sup>. In the right column, EryA is depicted in co-complex with MphA (shown in green) from PDB: 5IGP<sup>2</sup>.



| Plasmid             | Description                                          | Insert 1     | Insert 2  | Insert 3 | Insert 4    | Resistance   | Origin |
|---------------------|------------------------------------------------------|--------------|-----------|----------|-------------|--------------|--------|
| pCM54               | <i>ermC</i> in pJKR-H-mphR replaced with <i>mphA</i> | PmphR, sfGFP | mphR      | mphA     | -           | Ampicillin   | pUC    |
| pCM98               | MphR mutation T17R introduced to pCM54               | PmphR, sfGFP | mphR-T17R | mphA     | -           | Ampicillin   | pUC    |
| pCM120              | <i>mphA</i> cassette inserted into pJKR-H-mphR       | PmphR, sfGFP | mphR      | mphA     | <i>ermC</i> | Ampicillin   | pUC    |
| pCM121              | MphR mutation T17R introduced to pCM120              | PmphR, sfGFP | mphR-T17R | mphA     | <i>ermC</i> | Ampicillin   | pUC    |
| pJKR-H-mphR         | see Rogers (2015)                                    | PmphR, sfGFP | mphR      | -        | <i>ermC</i> | Ampicillin   | pUC    |
| pMLGFP              | see Kasey (2017)                                     | PmphR, GFP   | mphR      | -        | -           | Ampicillin   | pBR322 |
| pMLGFP- <i>ermC</i> | <i>ermC</i> cassette inserted into pMLGFP            | PmphR, GFP   | mphR      | -        | <i>ermC</i> | Ampicillin   | pBR322 |
| pJZ12               | see Kasey (2017)                                     | -            | -         | mphA     | -           | Tetracycline | p15A   |

**Table S1.** Strains and plasmids used in this study. For insertion of *mphA*, plasmid pJZ12 was used as template (including promoter and terminator regions). For insertion of *ermC*, plasmid pJKR-H-mphR was used as template (including promoter and terminator regions).

| Plasmid     | Antibiotic | Two-fold increase parameter (nM) |
|-------------|------------|----------------------------------|
| pJKR-H-mphR | EryA       | 397                              |
| pCM54       | EryA       | 33.4                             |
| pCM120      | EryA       | 40.2                             |
| pCM121      | EryA       | 13.2                             |
| pJKR-H-mphR | Clr        | 9,787                            |
| pCM120      | Clr        | 52.2                             |
| pJKR-H-mphR | Azr        | 3,340                            |
| pCM120      | Azr        | 45.6                             |
| pJKR-H-mphR | Rxr        | 23,997                           |
| pCM120      | Rxr        | 2,414                            |

**Table S2.** Macrolide response curves using multiple biosensor plasmids were analyzed to determine the EryA concentration at which a two-fold increase in sfGFP signal was observed, with concentrations denoted here as “Two-fold increase parameter”. For each macrolide compound, constructs expressing *mphA* (pCM54 and pCM120) showed significantly lower (and thus more sensitive) two-fold increase parameters compared to tests performed in the absence of *mphA* (using pJKR-H-mphR).

### Supplementary References

- [1] Zheng, J., Sagar, V., Smolinsky, A., Bourke, C., LaRonde-LeBlanc, N., and Cropp, T. A. (2009) Structure and function of the macrolide biosensor protein, MphR(A), with and without erythromycin, *J Mol Biol* 387, 1250-1260.
- [2] Fong, D. H., Burk, D. L., Blanchet, J., Yan, A. Y., and Berghuis, A. M. (2017) Structural Basis for Kinase-Mediated Macrolide Antibiotic Resistance, *Structure* 25, 750-761 e755.
